# Supplementary material for: Deciphering the Anti-Aflatoxinogenic Properties of Eugenol Using a Large-Scale q-PCR Approach
Source: PubMed Central journal article supplement (PMC4885038; doi:10.3390/toxins8050123), 2016-04-26
Supplement: toxins-08-00123-s001.pdf [file toxins-08-00123-s001.pdf]

## Supplementary Materials: Deciphering the Anti-Aflatoxinogenic Properties of Eugenol Using a Large-Scale q-PCR Approach

Isaura Caceres, Rhoda El Khoury, Ángel Medina, Yannick Lippi, Claire Naylies, Ali Atoui, André El Khoury, Isabelle P. Oswald, Jean-Denis Bailly and Olivier Puel

**Table S1.** Gene expression values of regulatory factors that were not impacted upon Eugenol addition. Values are expressed in fold change and compared to a control fixed at 1.

| Gene Name    | Values | p-Value |
|--------------|--------|---------|
| <i>abaA</i>  | 1.13   | 0.8179  |
| <i>ap-1</i>  | 1.12   | 0.4589  |
| <i>areA</i>  | 1.29   | 0.4578  |
| <i>atfA</i>  | 2.09   | 0.0537  |
| <i>brlA</i>  | 0.77   | 0.1953  |
| <i>cat2</i>  | 1.13   | 0.8072  |
| <i>catA</i>  | 1.84   | 0.3623  |
| <i>creA</i>  | 1.32   | 0.648   |
| <i>fadA</i>  | 0.95   | 0.891   |
| <i>fcr3</i>  | 0.73   | 0.0836  |
| <i>flbA</i>  | 0.55   | 0.2958  |
| <i>fluG</i>  | 1.11   | 0.5914  |
| <i>gprG</i>  | 1.52   | 0.1591  |
| <i>gprH</i>  | 0.84   | 0.3971  |
| <i>gprP</i>  | 1.29   | 0.2462  |
| <i>laeA</i>  | 1.05   | 0.7673  |
| <i>meaB</i>  | 1.43   | 0.1367  |
| <i>mnSOD</i> | 0.84   | 0.3045  |
| <i>ppoA</i>  | 1.26   | 0.2914  |
| <i>ppoB</i>  | 0.77   | 0.4413  |
| <i>ppoC</i>  | 0.89   | 0.6097  |
| <i>rasA</i>  | 0.88   | 0.4225  |
| <i>SOD1</i>  | 0.95   | 0.8985  |
| <i>srrA</i>  | 1.69   | 0.2001  |
| <i>velB</i>  | 1.43   | 0.3543  |
| <i>vosA</i>  | 1.49   | 0.1905  |

Table S2. Primer sequences of the 62 designed genes.

| Access Number | Gene         | nM      | Primers Sequences 5' to 3'    |                                 |
|---------------|--------------|---------|-------------------------------|---------------------------------|
| AFLA_139380   | <i>aflA</i>  | 300/900 | F: CCAGTCGGTGGTGTGCAAAA       | R: CGCAGCACCCAGAGCTT            |
| AFLA_139370   | <i>aflB</i>  | 300/300 | F: GTCTGCGCAGGCCATTTC         | R: AGCTCTGGCCTTCAACAGTCTC       |
| AFLA_139410   | <i>aflC</i>  | 300/300 | F: CTGACCCCGGCATTTCG          | R: TGCCAGATTCTCATATTCCCG        |
| AFLA_139390   | <i>aflD</i>  | 300/900 | F: AGGCATCTGTGCTCGGATTG       | R: TGCCCCGATGTAGTCTCCTTAGT      |
| AFLA_139310   | <i>aflE</i>  | 900/300 | F: CTGCAACACTCGGCTAGAAACA     | R: GAAGGGTTCGATCGGCTGT          |
| AFLA_139260   | <i>aflG</i>  | 900/900 | F: CATGCAGAGTAACCGCATCGT      | R: TTGTAGACCGACGGATGTCCC        |
| AFLA_139330   | <i>aflH</i>  | 900/900 | F: CCAGCTCCACGGTCGG           | R: CTTAAGGTCAAAGATTCCCTCGG      |
| AFLA_139230   | <i>aflI</i>  | 300/300 | F: GATCGGCTCGTTTGAGGGA        | R: GCAAAAATGATATTCAGCTGGTTGAC   |
| AFLA_139320   | <i>aflJ</i>  | 300/900 | F: GCTCCGTGGCACCAGTT          | R: TCGTCACGCTCTCATCGG           |
| AFLA_139190   | <i>aflK</i>  | 300/300 | F: ACAGCGCGAAATGTTTTATATGC    | R: GCGCCTTTCGAGCCTCTG           |
| AFLA_139250   | <i>aflL</i>  | 300/300 | F: CCGATTCGTACCCGAAGAGAC      | R: TCGGCAAAGTAGGTACCGAGAT       |
| AFLA_139300   | <i>aflM</i>  | 900/900 | F: TCCTGGAGCCATTAAGACTGATATGT | R: GCCAAGCGGCGCACTC             |
| AFLA_139280   | <i>aflN</i>  | 300/300 | F: CCAGGCTCGCCAGGAAGT         | R: AGCTTGAAGTCTGGCATAGGAAGG     |
| AFLA_139220   | <i>aflO</i>  | 300/900 | F: CCCAAGAGTATACCTCGAGTGC     | R: AAGGTCCCGAGATGTCGAATAGTT     |
| AFLA_139210   | <i>aflP</i>  | 900/300 | F: TATTCTACATGACTATCCCGATGCTG | R: GCGCGACTTGCTTGGGT            |
| AFLA_139200   | <i>aflQ</i>  | 900/900 | F: GGGAGGATCGGACACGACA        | R: CATGGCCACGAAAAGCTAGAC        |
| AFLA_139360   | <i>aflR</i>  | 900/900 | F: GCGGCACAGCTTGTTCTGA        | R: CCGGTATCCCTGCTGCATC          |
| AFLA_139340   | <i>aflS</i>  | 900/900 | F: AACGGTCGTGCATGTGGG         | R: CGGCCTTAGCTTCTGTCTGC         |
| AFLA_139420   | <i>aflT</i>  | 300/300 | F: GTAGCATGCGCCTCCGTCT        | R: GCGAATGGCTTGAACCAG           |
| AFLA_139180   | <i>aflV</i>  | 300/900 | F: CCTGGTGGTTCCTCGCTGT        | R: TGAAATATGCGGTTTGAAGAATCTTG   |
| AFLA_139170   | <i>aflW</i>  | 300/900 | F: CGATGTCTTTGTGCGGACG        | R: GTGTTGCCCGCTAGCACTC          |
| AFLA_139160   | <i>aflX</i>  | 900/900 | F: GATCCACGCTACTGCCGT         | R: GATCTCAGGATGCAATCGGTTT       |
| AFLA_139150   | <i>aflY</i>  | 300/300 | F: GGTGTCCCTACGGTCTTAAATGAGT  | R: CAATGGGTGGAGAAAGCCAGA        |
| AFLA_139240   | <i>hypB</i>  | 900/300 | F: TCCTGCACTTCAAGCTACCGC      | R: GACGCTCATCATGGCTCCG          |
| AFLA_139400   | <i>hypC</i>  | 900/900 | F: GGTCTTTTTGACGGGAGCC        | R: TCTCGATAAGAATGGGAATGGTGA     |
| AFLA_139270   | <i>hypD</i>  | 300/900 | F: TTGCGTTTGCCGACGG           | R: GCGCATAACTCCAATGTCCC         |
| AFLA_139290   | <i>hypE</i>  | 900/900 | F: AAGTTCGACTTTCCCGC          | R: CAAAGTTGATAATAGCAAATCCGTCATA |
| AFLA_029620   | <i>abaA</i>  | 900/900 | F: TACAAAATACTGGCAAAGGAGGTC   | R: CCCGTACAAGCCTCTCCCA          |
| AFLA_129340   | <i>ap-1</i>  | 900/300 | F: CTTGCACCAAGATTGGGACC       | R: TCGTACGCAATTCGGAGCA          |
| AFLA_049870   | <i>areA</i>  | 300/900 | F: CAGCCAATCCGCGAAC           | R: CCCATTCCTGACTAGCCCCTT        |
| AFLA_031340   | <i>atfA</i>  | 900/900 | F: GCAGTTACAGGCACCTTAACACATC  | R: CGGCGCCTGGGAGTCTT            |
| AFLA_082850   | <i>brlA</i>  | 300/300 | F: GCGTGCCTTCTCCCGC           | R: GGAGTCCATCCGGTGTGAGTT        |
| AFLA_068620   | $\beta$ -tub | 300/900 | F: AACGTCTACTTCAACGAGGCCA     | R: GTACCAGGCTCAAGATCAACGAG      |
| AFLA_122110   | <i>cat2</i>  | 300/900 | F: TGGCAGCAGTGACGGAAAG        | R: AGCCCAAGCGGCAACAA            |

Table S2. Cont.

|             |              |         |                                 |                                 |
|-------------|--------------|---------|---------------------------------|---------------------------------|
| AFLA_056170 | <i>catA</i>  | 300/900 | F: ATTAAGTTCCCGGATTTTGTCCA      | R: GGTACCTCGTTGTGCGGCT          |
| AFLA_134680 | <i>creA</i>  | 300/900 | F: CAGCCGGAAGGCCCC              | R: CATATCTTGCACCGCGACCT         |
| AFLA_018340 | <i>fadA</i>  | 900/900 | F: TACATCCTCAACCGCTTCGTG        | R: GGTTCCTCTGGATGATGATGTCATT    |
| AFLA_133560 | <i>fcf3</i>  | 300/900 | F: GGCACAGAACAGAGCAGCTCAA       | R: GCACATGTCGCTCCTTTTCGTT       |
| AFLA_134030 | <i>flbA</i>  | 300/900 | F: CTGGCTGCAGCATATGGTCTT        | R: CATTGATTTCGTCATCCCCTACAG     |
| AFLA_101920 | <i>fluG</i>  | 300/300 | F: CGCCGGTTACCTAGGCGT           | R: TTGGCGGCATCGTGGA             |
| AFLA_025100 | <i>gpdA</i>  | 900/900 | F: CGTGTGTTGACCTCATTGCCT        | R: GGTGACCTGATAATCCGGGAAC       |
| AFLA_060740 | <i>gprA</i>  | 900/900 | F: CTTCTGCAGTATCTTCATTATCAAGCTC | R: AATCGAAAGCAGCGCTGG           |
| AFLA_067770 | <i>gprG</i>  | 300/900 | F: CCGCATTACAGCGAAACTT          | R: GCGGTTAGGGTTTGTGAGGAG        |
| AFLA_006920 | <i>gprH</i>  | 300/900 | F: TTGATTGTACCTGGGTTCTTTC       | R: CATAGTTCAGAGCAAAGTTGTGGGA    |
| AFLA_009790 | <i>gprK</i>  | 300/900 | F: CTGCCATGCAGGTAGTCAAC         | R: TCCAAATGGACAGGCAAATCC        |
| AFLA_088190 | <i>gprP</i>  | 300/300 | F: CGATGCAGTCTTTCTAAGGGTGG      | R: GCCATCGATTGTACCATGTGTGA      |
| AFLA_033290 | <i>laeA</i>  | 900/900 | F: TGCCAACAAATACCCAGACG         | R: TCGCAATTCTTTGGGTGGTT         |
| AFLA_031790 | <i>meaB</i>  | 900/900 | F: CCAAAGCACTATGATCAGCTTGAA     | R: CCCACGGACGACTCATGC           |
| AFLA_033420 | <i>mnSOD</i> | 300/300 | F: GGTGGCTAATGGACCGGG           | R: CATACGAGGCCTTGTTATTGAAGTACTG |
| AFLA_110650 | <i>msnA</i>  | 900/900 | F: GACGTCCATGCCGAGCTTT          | R: AATTGGCGTTGATGAAGACAGG       |
| AFLA_091490 | <i>mtfA</i>  | 300/900 | F: GCATCGACATATGCTGCAAAG        | R: GGCGCAAAGGTGGAGTAGG          |
| AFLA_131330 | <i>nsdC</i>  | 300/900 | F: TCCAGGACCACATGACTCCAA        | R: GCTGTGCCCTTAAAGCAGCTACT      |
| AFLA_030580 | <i>pacC</i>  | 900/300 | F: CAAGGATGTTCTGAGAAGTGTCCC     | R: CGTTCGCAGACGTGCTCATA         |
| AFLA_026790 | <i>ppoA</i>  | 300/900 | F: ATCAAGAGGCTGGCGAAGGT         | R: GGGCGCCTTCCATGAAGTA          |
| AFLA_120760 | <i>ppoB</i>  | 300/900 | F: AGTCTCTATGCGTTCCTATGACTTG    | R: CGTCCCTTCCCAGGAAT            |
| AFLA_030430 | <i>ppoC</i>  | 300/300 | F: GTTACAATCAGGCTCAAATGTTC      | R: CAGGCAGTAGCGCATCAACTT        |
| AFLA_132380 | <i>rasA</i>  | 300/300 | F: GCGAGCCGTCACAGTAGAAGAG       | R: CGGATGTTTCGATAAATTTGCAG      |
| AFLA_099000 | <i>sod1</i>  | 900/300 | F: CGAGAGCGTACTTGGCCGT          | R: TCTTCTTGACTCCGGGTGTT         |
| AFLA_034540 | <i>srrA</i>  | 300/900 | F: TGTCGTCAGATTGGCGGAA          | R: GCCTCGAGTCCGTCGAAAG          |
| AFLA_066460 | <i>veA</i>   | 300/300 | F: CGTCAGCCGGATCACTCG           | R: GACGGTCCGCAGAGGACTT          |
| AFLA_081490 | <i>velB</i>  | 300/300 | F: GGCTTCGGCGACAAGGAT           | R: TCTGCGTTCCACAAGTCTACCA       |
| AFLA_026900 | <i>vosA</i>  | 300/900 | F: GGGTGTTCAGATTATGCGATG        | R: CCCGTTGAATCCCCGCTAG          |
